# Supplementary material for: Impact of Light and Dark Treatment on Phenylpropanoid Pathway Genes, Primary and Secondary Metabolites in Agastache rugosa Transgenic Hairy Root Cultures by Overexpressing Arabidopsis Transcription Factor AtMYB12
Source: MDPI journal article supplement (doi:10.3390/life13041042), 2023-04-19
Supplement: s1 [file s1]

**Table S1.** Total phenolics content of transgenics (M-3, M-4, M-9) and control (G) hairy root line of Korean mint.

| Samples | Total phenolics (µg/g dry weight) |
|---------|-----------------------------------|
| G       | 957.5 ± 52.7c                     |
| M-3     | 1005.5 ± 29.1c                    |
| M-4     | 1108.8 ± 7.3b                     |
| M-9     | 1203 ± 11.5a                      |

**Note:** Control and *AtMYB12*-overexpressing hairy root lines were denoted as G and M, respectively. Mean values denoted with different letters are significantly different ( $p < 0.05$ , ANOVA, Duncan's multiple range test).

**Table S3.** Retention times (RTs), relative retention times (RRTs) and quantification ion data of hydrophilic compounds in control and transgenic hairy root of Korean mint grown under light and dark conditions.

| S. No. | Compound          | RT <sup>a</sup> | RRT <sup>b</sup> | Quantification ion <sup>c</sup> |
|--------|-------------------|-----------------|------------------|---------------------------------|
| 1      | Pyruvic acid      | 06:30.9         | 0.520            | 174                             |
| 2      | Lactic acid       | 06:36.3         | 0.527            | 117                             |
| 3      | Alanine           | 07:06.1         | 0.567            | 116                             |
| 4      | Oxalic acid       | 07:31.6         | 0.601            | 147                             |
| 5      | Glycolic acid     | 07:41.0         | 0.613            | 205                             |
| 6      | Valine            | 08:17.6         | 0.662            | 144                             |
| 7      | Serine            | 08:44.0         | 0.697            | 116                             |
| 8      | Glycerol          | 08:46.9         | 0.701            | 147                             |
| 9      | Phosphoric acid   | 08:48.9         | 0.704            | 299                             |
| 10     | Ethanolamine      | 08:49.0         | 0.704            | 174                             |
| 11     | Leucine           | 08:50.0         | 0.705            | 158                             |
| 12     | Isoleucine        | 09:03.1         | 0.722            | 158                             |
| 13     | Proline           | 09:10.4         | 0.732            | 142                             |
| 14     | Glycine           | 09:12.8         | 0.735            | 174                             |
| 15     | Succinic acid     | 09:15.3         | 0.739            | 147                             |
| 16     | Glyceric acid     | 09:20.0         | 0.745            | 147                             |
| 17     | Fumaric acid      | 09:34.8         | 0.765            | 245                             |
| 18     | Threonine         | 09:51.2         | 0.786            | 291                             |
| 19     | beta-Alanine      | 10:18.3         | 0.822            | 174                             |
| 20     | Malic acid        | 10:44.3         | 0.857            | 147                             |
| 21     | Aspartic acid     | 11:01.0         | 0.879            | 100                             |
| 22     | Methionine        | 11:06.6         | 0.887            | 176                             |
| 23     | Pyroglutamic acid | 11:10.6         | 0.892            | 156                             |
| 24     | GABA              | 11:10.8         | 0.892            | 304                             |
| 25     | Glutamic acid     | 11:48.8         | 0.943            | 246                             |
| 26     | Phenylalanine     | 12:00.0         | 0.958            | 218                             |
| 27     | Xylose            | 12:03.3         | 0.962            | 103                             |
| 28     | Arabinose         | 12:10.1         | 0.971            | 103                             |
| 29     | Asparagine        | 12:13.7         | 0.976            | 116                             |
| 30     | Ribitol           | 12:31.8         | 1.000            | 217                             |
| 31     | Glutamine         | 13:00.0         | 1.038            | 156                             |
| 32     | Shikimic acid     | 13:07.8         | 1.048            | 204                             |
| 33     | Citric acid       | 13:14.9         | 1.057            | 273                             |
| 34     | Quinic acid       | 13:30.1         | 1.078            | 345                             |
| 35     | Fructose1         | 13:34.2         | 1.083            | 103                             |
| 36     | Fructose2         | 13:38.0         | 1.088            | 103                             |
| 37     | Mannose           | 13:40.6         | 1.092            | 319                             |
| 38     | Galactose         | 13:43.3         | 1.095            | 319                             |
| 39     | Glucose1          | 13:46.9         | 1.100            | 319                             |
| 40     | Glucose2          | 13:55.1         | 1.111            | 319                             |
| 41     | Mannitol          | 13:58.9         | 1.116            | 319                             |
| 42     | Lysine            | 14:00.7         | 1.118            | 174                             |
| 43     | Tyrosine          | 14:10.2         | 1.131            | 218                             |

|    |                |         |       |     |
|----|----------------|---------|-------|-----|
| 44 | Inositol       | 15:05.2 | 1.204 | 305 |
| 45 | Ferulic acid   | 15:13.8 | 1.215 | 338 |
| 46 | Tryptophan     | 15:58.5 | 1.275 | 202 |
| 47 | Sinapinic acid | 16:15.3 | 1.297 | 338 |
| 48 | Sucrose        | 17:59.6 | 1.436 | 217 |

---
