# Supplementary material for: Impact of Light and Dark Treatment on Phenylpropanoid Pathway Genes, Primary and Secondary Metabolites in Agastache rugosa Transgenic Hairy Root Cultures by Overexpressing Arabidopsis Transcription Factor AtMYB12
Source: Life (Basel). 2023 Apr 19;13(4):1042. doi: 10.3390/life13041042 (PMC10142052; doi:10.3390/life13041042)
Supplement: Supplementary file 1 [file life-13-01042-s001.zip › Table S2.csv]

Table S2: Metabolic pathways where the identified metabolites are involved in control and transgenic hairy root of Korean mint grown under light and dark conditions.
	Total Cmpd	Hits	Raw p	#NAME?	Holm adjust	FDR	Impact
Alanine, aspartate and glutamate metabolism	22	9	0.00042931	3.3672	0.017472	0.0015455	0.77698
Isoquinoline alkaloid biosynthesis	6	1	0.47732	0.32119	1	0.47732	0.5
Phenylalanine metabolism	11	1	0.003522	2.4532	0.084529	0.0059434	0.47059
Glycine, serine and threonine metabolism	33	6	1.13E-05	4.9466	0.00061072	0.00027631	0.3547
Flavone and flavonol biosynthesis	10	1	0.064467	1.1907	0.3868	0.069625	0.35
beta-Alanine metabolism	18	2	0.0017493	2.7571	0.053122	0.0037785	0.25397
Tyrosine metabolism	16	3	0.0067308	2.1719	0.10312	0.0084686	0.21622
Glyoxylate and dicarboxylate metabolism	29	7	0.00042616	3.3704	0.017472	0.0015455	0.20653
Citrate cycle (TCA cycle)	20	4	0.00036292	3.4402	0.015776	0.0015455	0.18531
Pyruvate metabolism	22	3	0.0010762	2.9681	0.03659	0.0027673	0.16731
Arginine and proline metabolism	34	3	0.0030099	2.5215	0.081267	0.0057688	0.14404
Cysteine and methionine metabolism	46	3	0.00085102	3.0701	0.030637	0.0024187	0.13971
Butanoate metabolism	17	4	0.00035854	3.4455	0.015776	0.0015455	0.13636
Glutathione metabolism	26	3	0.0076455	2.1166	0.10312	0.0089751	0.13362
Glycolysis / Gluconeogenesis	26	3	2.05E-05	4.6889	0.0010439	0.00027631	0.12074
Tryptophan metabolism	28	1	0.0032049	2.4942	0.083328	0.0057688	0.12037
Valine, leucine and isoleucine biosynthesis	22	5	0.0017136	2.7661	0.053122	0.0037785	0.10727
Inositol phosphate metabolism	28	1	0.0070572	2.1514	0.10312	0.0084686	0.10251
Phenylalanine, tyrosine and tryptophan biosynthesis	22	4	0.00031853	3.4968	0.014334	0.0015455	0.1016
Phenylpropanoid biosynthesis	46	3	8.52E-05	4.0696	0.0041745	0.00076675	0.10038
Starch and sucrose metabolism	22	1	0.022317	1.6514	0.15622	0.025107	0.0889
Arginine biosynthesis	18	4	0.0010104	2.9955	0.035363	0.002728	0.08544
Pantothenate and CoA biosynthesis	23	3	0.00013604	3.8663	0.0063937	0.00091824	0.08423
Galactose metabolism	27	4	2.01E-05	4.6976	0.0010432	0.00027631	0.04252
Carbon fixation in photosynthetic organisms	21	3	0.00027442	3.5616	0.012623	0.0015455	0.03607
Sulfur metabolism	15	1	0.0051279	2.2901	0.10312	0.0074839	0.03315
Phosphatidylinositol signaling system	26	1	0.0070572	2.1514	0.10312	0.0084686	0.03285
Glycerolipid metabolism	21	2	0.00068832	3.1622	0.026156	0.0021864	0.01703
Glycerophospholipid metabolism	37	1	0.35346	0.45166	1	0.36706	0.00947
Flavonoid biosynthesis	47	1	0.064467	1.1907	0.3868	0.069625	0.00087
Lysine biosynthesis	9	2	1.40E-05	4.8531	0.00074327	0.00027631	0
Aminoacyl-tRNA biosynthesis	46	16	6.57E-05	4.1824	0.0032856	0.00070969	0
Glucosinolate biosynthesis	65	6	0.00013232	3.8784	0.0063514	0.00091824	0
Thiamine metabolism	22	2	0.00040615	3.3913	0.017058	0.0015455	0
Monobactam biosynthesis	8	2	0.00047051	3.3274	0.01835	0.001588	0
Cyanoamino acid metabolism	29	4	0.00079685	3.0986	0.029484	0.0023906	0
Pyrimidine metabolism	38	2	0.0016057	2.7943	0.052987	0.0037785	0
Selenocompound metabolism	13	1	0.001656	2.7809	0.052994	0.0037785	0
C5-Branched dibasic acid metabolism	6	1	0.0022999	2.6383	0.066698	0.0045998	0
Terpenoid backbone biosynthesis	30	1	0.0022999	2.6383	0.066698	0.0045998	0
Indole alkaloid biosynthesis	4	1	0.0032049	2.4942	0.083328	0.0057688	0
Tropane, piperidine and pyridine alkaloid biosynthesis	8	1	0.003522	2.4532	0.084529	0.0059434	0
Valine, leucine and isoleucine degradation	37	3	0.004518	2.3451	0.099396	0.0073931	0
Lysine degradation	18	1	0.0049106	2.3089	0.10312	0.0074839	0
Pentose and glucuronate interconversions	16	1	0.0051197	2.2908	0.10312	0.0074839	0
Propanoate metabolism	20	1	0.0051279	2.2901	0.10312	0.0074839	0
Porphyrin and chlorophyll metabolism	48	1	0.0055042	2.2593	0.10312	0.0076529	0
Nitrogen metabolism	12	2	0.0055271	2.2575	0.10312	0.0076529	0
Purine metabolism	63	1	0.0061609	2.2104	0.10312	0.0083171	0
Nicotinate and nicotinamide metabolism	13	1	0.006322	2.1991	0.10312	0.0083265	0
Ascorbate and aldarate metabolism	18	1	0.0070572	2.1514	0.10312	0.0084686	0
Amino sugar and nucleotide sugar metabolism	50	2	0.012281	1.9108	0.10312	0.01411	0
Fatty acid degradation	37	1	0.31168	0.50629	1	0.33001	0
Ubiquinone and other terpenoid-quinone biosynthesis	38	1	0.47732	0.32119	1	0.47732	0
